# Supplementary material for: Synthesis, structural characterization, protein binding, DNA cleavage and anticancer activity of fluorophore labelled copper(ii) complexes based on 1,8-naphthalimide conjugates
Source: Royal Society of Chemistry journal article supplement (doi:10.1039/d1nj02696h), 2021-01-01
Supplement: d1nj02696h1.pdf [file d1nj02696h1.pdf]

## Electronic Supplementary Information

### Synthesis, Structural Characterization, Protein Binding, DNA Cleavage and Anticancer Activity of Fluorophore Labelled Copper(II) Complexes Based on 1,8-Naphthalimide Conjugate

Sabiha A. Shaikh<sup>a</sup>, Satish S. Bhat<sup>a</sup>, Pooja L. Hegde, Vidyanand K Revankar<sup>\*a</sup>, Anup Kate<sup>b</sup>, Deepi Kirtani<sup>b</sup>, Anupa Kumbhar<sup>b</sup>, Vijay Kumbhar<sup>c</sup> and Kishore Bhat<sup>c</sup>

<sup>a</sup>Department of Chemistry, Karnatak University, Dharwad-580003, Karnataka, India.

E-mail: vkrevankar@rediffmail.com,

<sup>b</sup>Department of Chemistry, Savitribai Phule Pune University, Pune-411007, Maharashtra, India

<sup>c</sup>Maratha Mandal's Central Research Laboratory, Marathamandal Dental College and Research Centre, Belgaum, Karnataka, India.

(a)

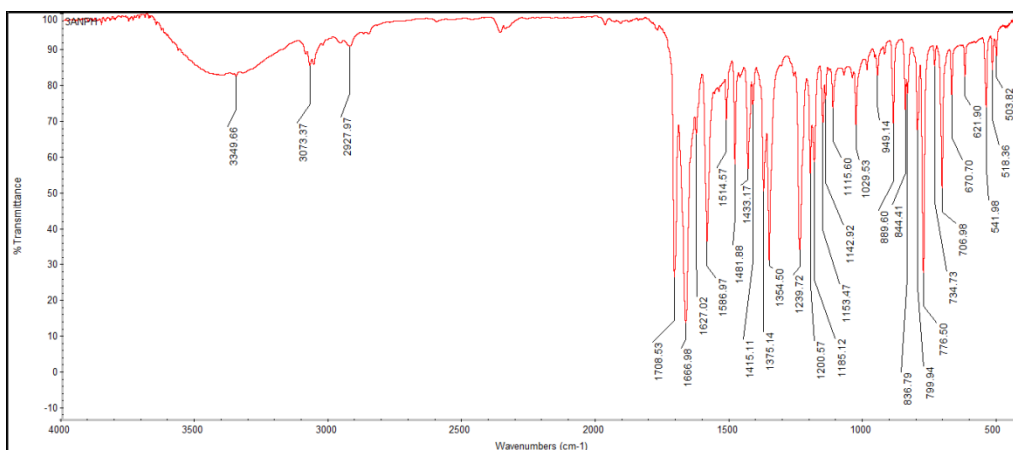

(b)

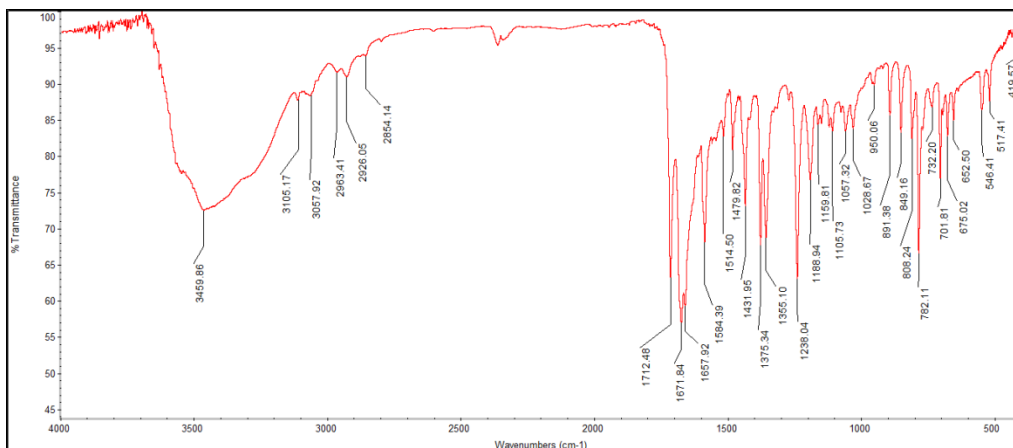

(c)

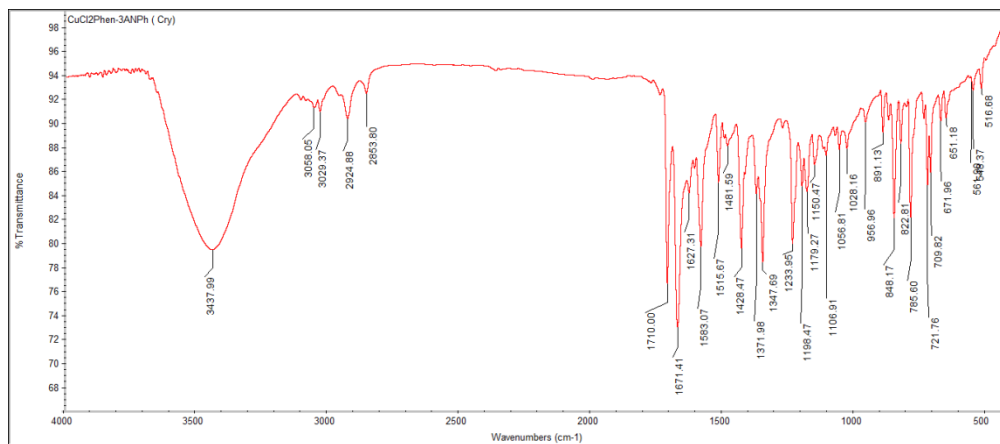

Figure S1. FT-IR spectra of (a) ligand (L), complexes (b) 1, (c) 2.

(a)

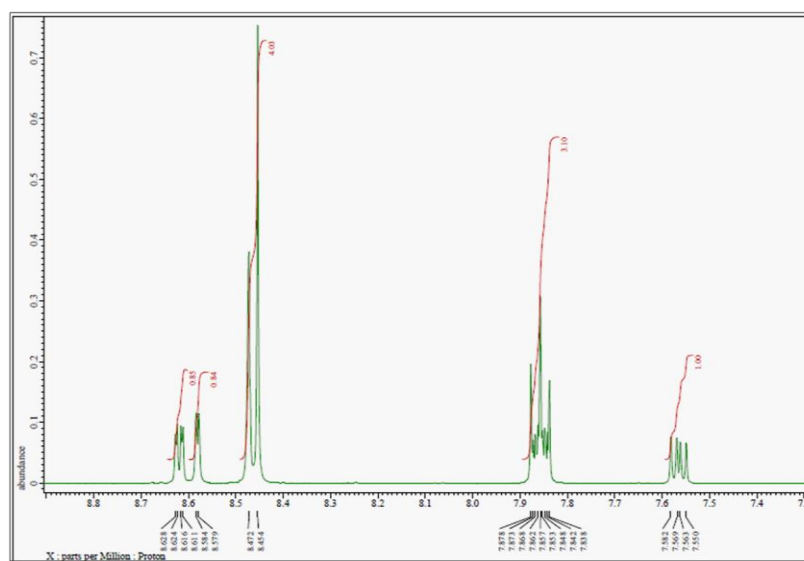

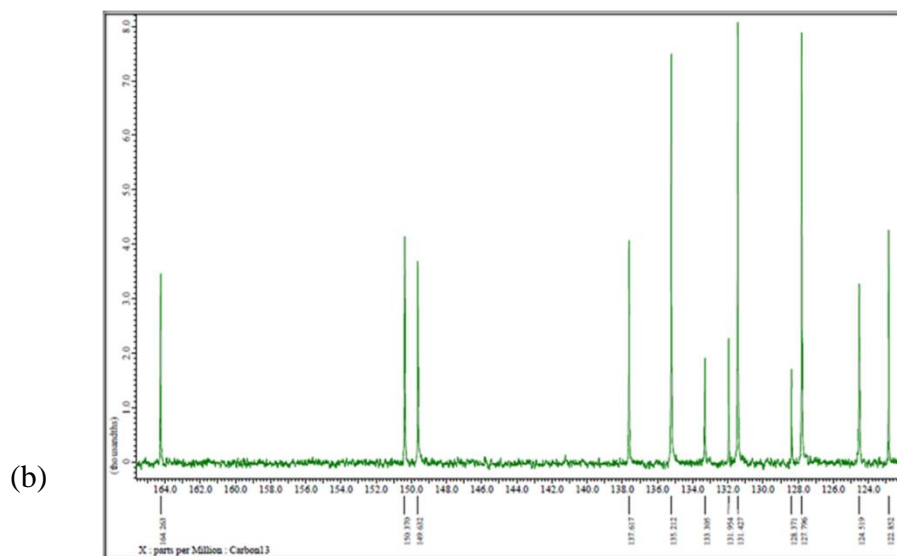

**Figure S2.** NMR spectra of ligand (**L**), (a)  $^1\text{H}$  NMR, (b)  $^{13}\text{C}$  NMR.

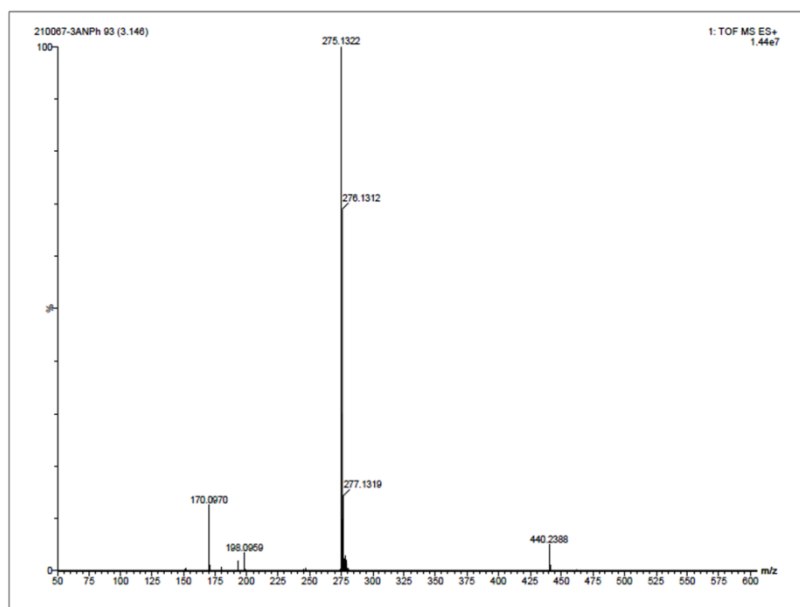

**Figure S3.** LC-MS spectrum of the ligand **L** showing significant peak at  $m/z$  275 corresponds to  $[\text{M}+\text{H}^+]$ .

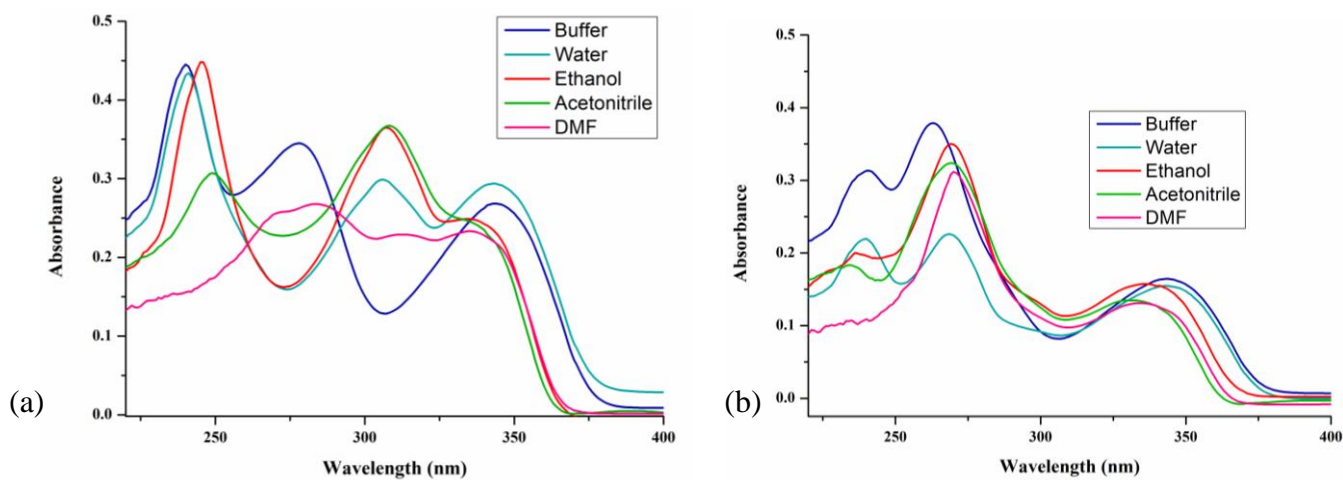

**Figure S4.** UV-visible spectra of complexes (a) **1**, (b) **2**, in different solvents; phosphate buffer, water, ethanol, acetonitrile, DMF (10  $\mu\text{M}$ ).

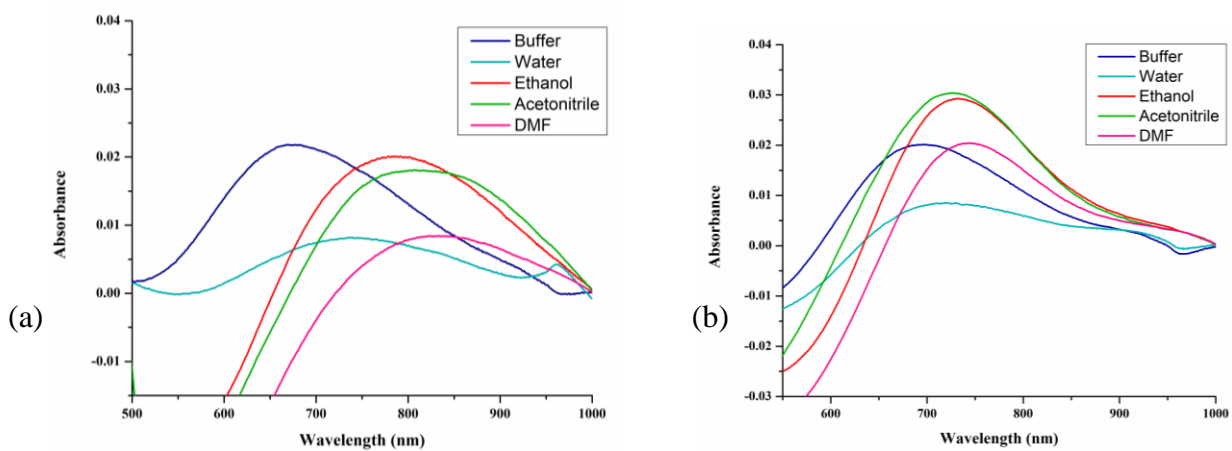

**Figure S5.** UV-visible spectra for the complexes (a) **1** and (b) **2** in different solvents phosphate buffer, water, ethanol, acetonitrile, DMF (500  $\mu\text{M}$ ) showing MLCT transitions.

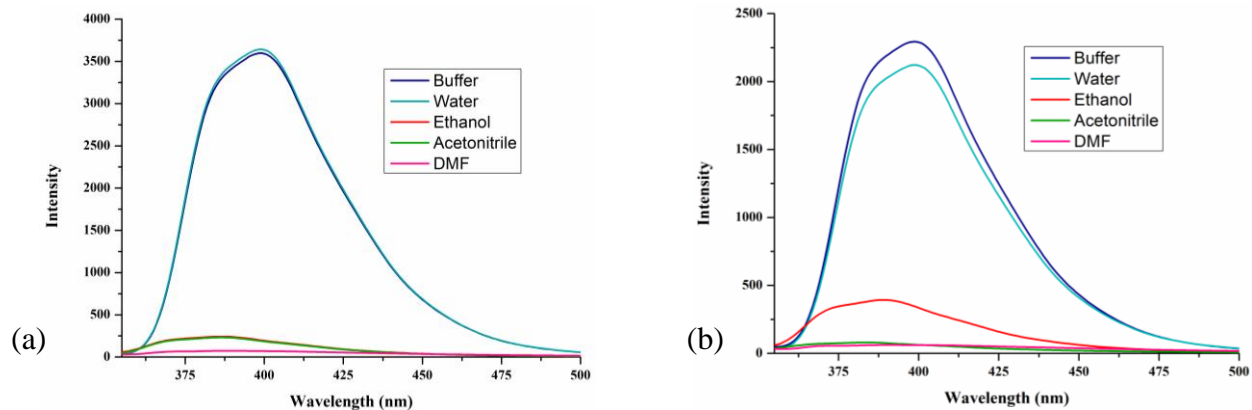

**Figure S6.** Fluorescence spectra of complexes (a) **1** and (b) **2** in different solvents phosphate buffer, water, ethanol, acetonitrile, DMF (10  $\mu$ M).

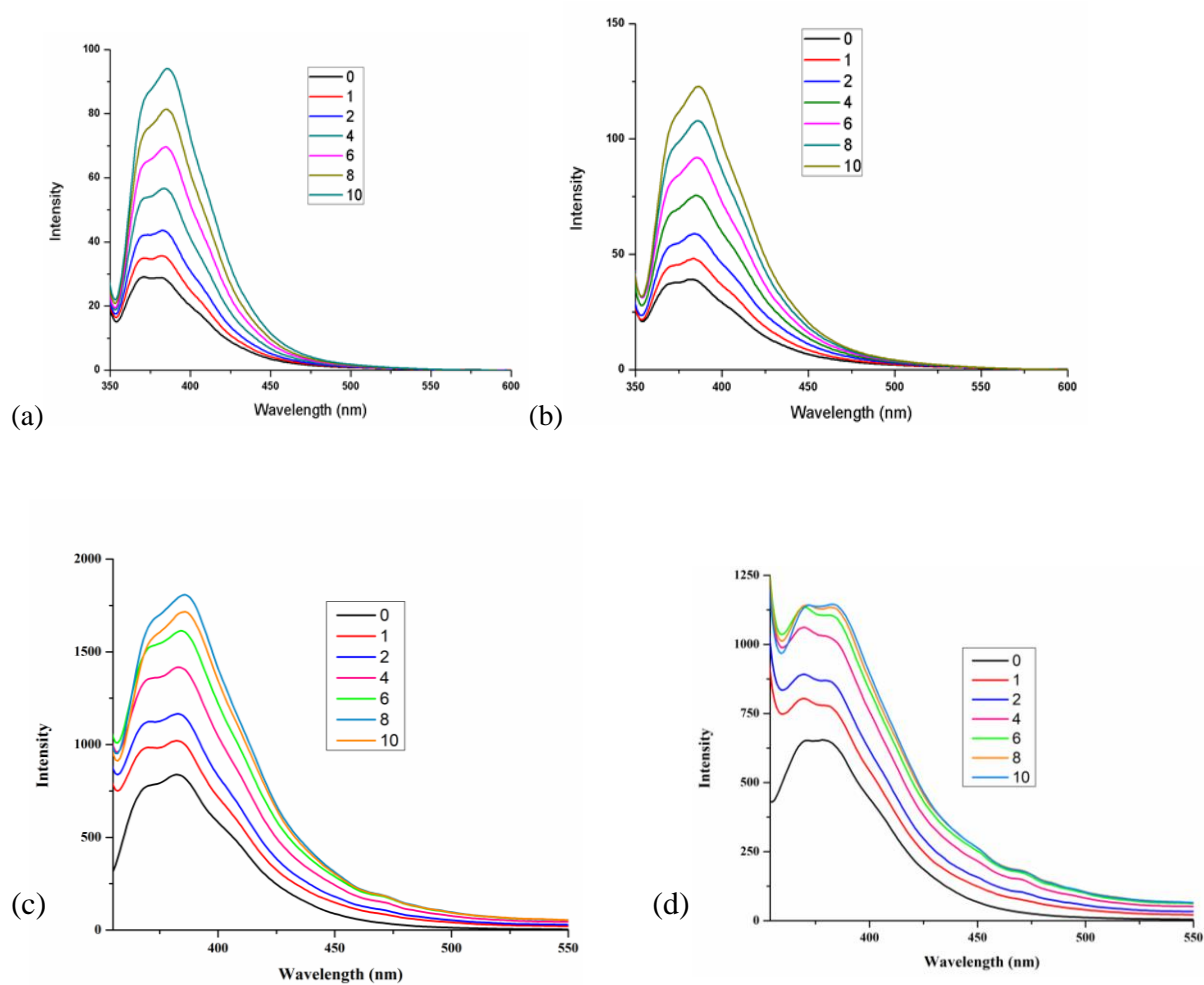

**Figure S7:** The changes in fluorescence spectra of complexes in acetonitrile upon gradual addition of water (a) **1** (b) **2** and buffer (c) **1** (d) **2**.

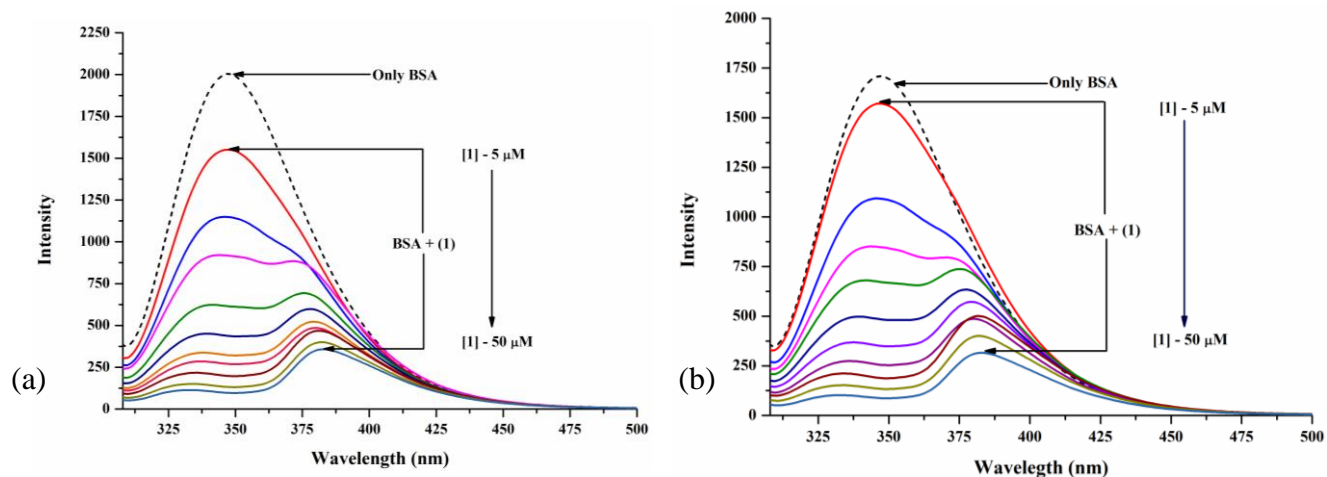

**Figure S8.** Fluorescence spectra of interaction of BSA (50  $\mu\text{M}$ ,  $\lambda_{\text{ex}}=295\text{ nm}$ ) with complex **1** of various concentrations (5, 10, 15, 20, 25, 30, 35, 40, 45, 50  $\mu\text{M}$ ) at (a) 306K and (b) 313K.

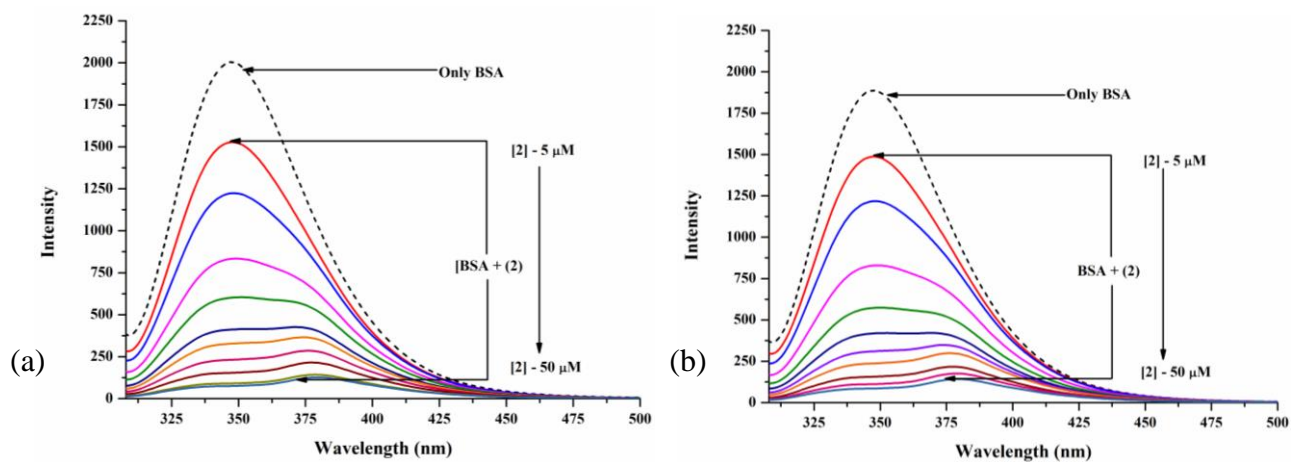

**Figure S9.** Fluorescence spectra of interaction of BSA (50  $\mu\text{M}$ ,  $\lambda_{\text{ex}}=295\text{ nm}$ ) with complex **2** of various concentrations (5, 10, 15, 20, 25, 30, 35, 40, 45, 50  $\mu\text{M}$ ) at (a) 306K and (b) 313K.

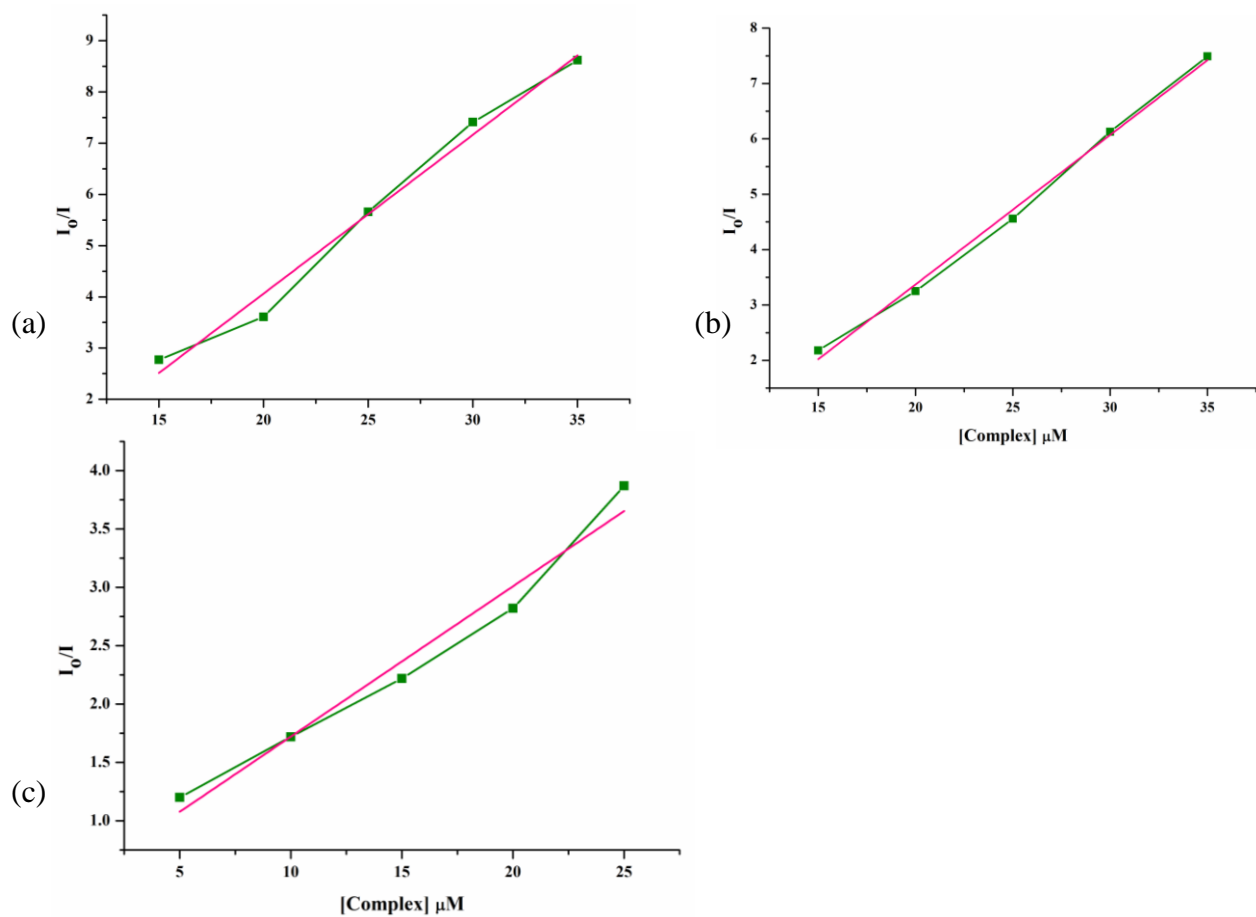

**Figure S10.** Plots for the Stern – Volmer quenching constant for the interaction of BSA with complex **1** at (a) 301K, (b) 306K, (c) 313K.

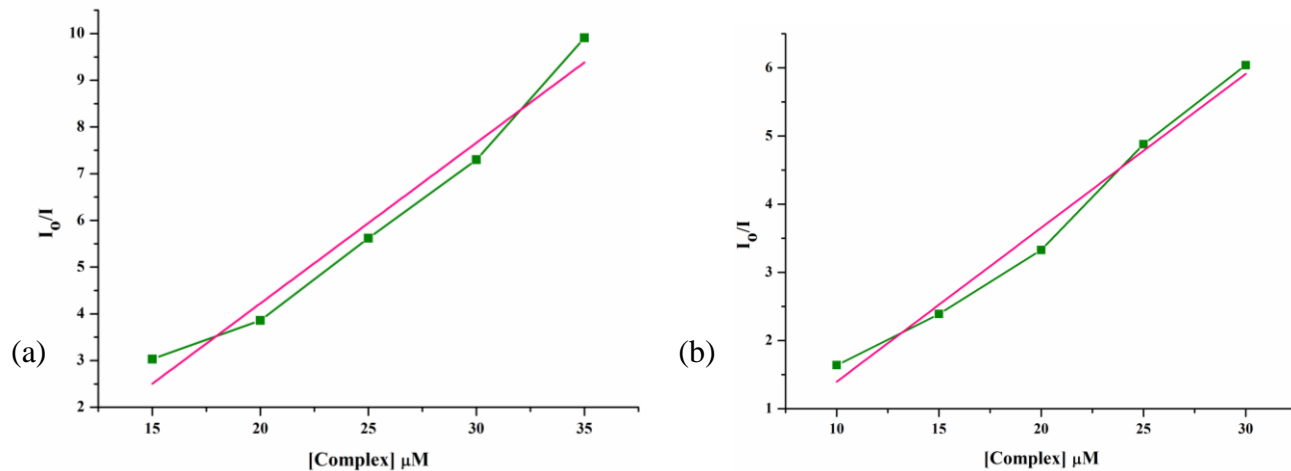

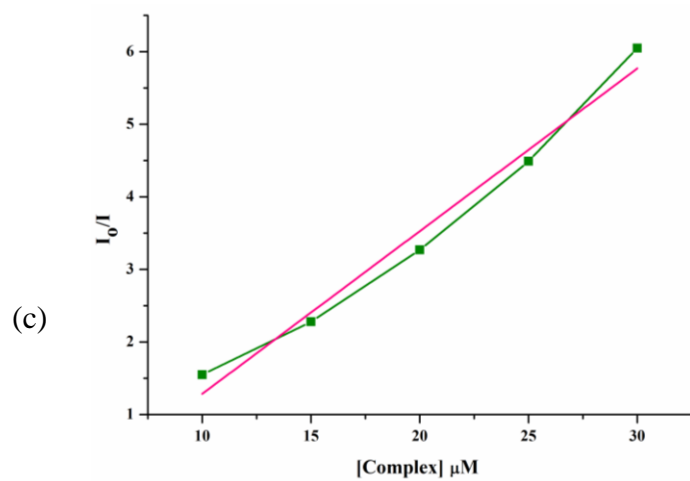

**Figure S11.** Plots for the Stern –Volmer quenching constant for the interaction of BSA with complex **2** at (a) 301K, (b) 306K, (c) 313K.
